# Supplementary material
Source: publisher site journal article supplement (https://www.dovepress.com/article/363113)
Supplement: Supplementary file 1 [file get_supplementary_file.php]

Supplement Table 1 Geographic distribution of 108 patients

| Province/autonomous  region | N (%) |
| --- | --- |
| Beijing | 56 (51.9) |
| Inner Mongolia | 22 (20.4) |
| Hebei | 11 (10.2) |
| Shanxi | 5 (4.6) |
| Liaoning | 4 (3.7) |
| Heilongjiang | 4 (3.7) |
| Jilin | 2 (1.9) |
| Henan | 2 (1.9) |
| Shandong | 1 (0.9) |
| Zhejiang | 1 (0.9) |

Supplement Table 2 Symptoms of 157 anaphylactic reactions

|  | total (n= 157) |
| --- | --- |
| Symptoms, n (%) |  |
| **Skin and mucocutaneous（any)** | 135 (86.0) |
| Hives | 90 (57.3) |
| Angioedema | 50 (31.8) |
| Itching | 23 (14.6) |
| Redness/Rash | 2 (1.2) |
| **Oropharyngeal** | 25 (15.9) |
| Throat closing or swelling | 19 (12.1) |
| Throat tingling or itching | 5 (3.2) |
| Hoarseness | 2 (1.3) |
| **Respiratory(any)** | 116 (73.9) |
| Breathing difficulty | 61 (38.9) |
| wheezing | 43 (27.4) |
| shortness of breath | 29 (18.5) |
| cough | 27 (17.2) |
| cyanosis | 1 (0.6) |
| **Gastrointestinal (any）** | 33 (21.0) |
| vomiting | 16 (10.2) |
| pain | 15 (9.6) |
| diarrhea | 2 (1.3) |
| nausea | 2 (1.3) |
| **Cardiovascular(any )** | 14 (8.9) |
| loss of consciousness/Confusion | 13 (8.3) |
| hypotension | 1 (0.6) |
| incontinence | 1 (0.6) |
| **Neuologic(any)** | 10 (6.4) |
| persistent crying, restlessness | 3 (1.9) |
| drowsiness | 2 (1.3) |
| faintness | 1 (0.6) |
| amaurosis | 3 (1.9) |
| seizure | 1 (0.6) |
| **Severe anaphylaxis** | 38 (24.2) |

Supplement Table 3 Characteristics of food+exercise /exercise induced anaphylaxis (16 cases, 22 episodes)

| case No. | Sex | Age at onset，year | Episodes | Characteristics of episodes | food triggers | type of exercise | pollen season | other diseases | specific IgE |
| --- | --- | --- | --- | --- | --- | --- | --- | --- | --- |
| 1 | F | 3Y | 1 | hives, wheezing ,periorbital edema | pitaya; | jumping on the carpet indoor | NO | AR | T-IgE 101KU/L, w6-12.9KUA/L，f13-0.91KUA/L; |
| 2 | F | 12Y | 3 | facial edema, SOB, breathing difficulty | Not recorded in chart | outdoor jogging | Yes （3 episode in Autumn） | AR ,AS | T-IgE 853KU/L ,m3-6.38, d1-98.5, d2-100, m6-34.6, e1-4.71, e5-0.86, w6-9.68, w1-3.12; f14-1.5,f4-3.37, f13-1.48, |
| 3 | M | 12Y | 2 | periorbital edema，skin itching，SOB | episode 1: cauliflower; episode 2: Not recorded in chart; | outdoor running | episode 1:Autumn; | AR | T-IgE 633KU/L，m3-4.0KUA/L, d1-1.14, d2-1.3,m6-20.8, w6-2.75, w1-3.14, t3-1.57,f14-1.48,f4-2.4,f13-1.7,f23-0.85,f24-1.51 |
| 4 | M | 13Y | 1 | hives,LOC，seizure；biaphasic anaphylaxis; | Lunch mix food (egg, tofu, rice) | outdoor playing basketball | NO | AR, AS | T-IgE 262KU/L，m3-2.75KUA/L,m6-26KUA/L,w6-3.27KUA/L,w1-4.92KUA/L,t3-5.48KUA/L,f13-0.43KUA/L |
| 5 | M | 13Y | 1 | periorbital edema，SOB | lunch mix food (egg、leek) | outdoor playing basketball | NO | (-) | d2-0.39KUA/L ,w6-4.03KUA/L，t3-1.57KUA/L,f13-1.03 |
| 6 | F | 10Y | 1 | hives, hoarseness, SOB | wheat | exercise （unclear) | NO | （-） | w6-0.37,f4-0.47，f13-1.37 |
| 7 | M | 7Y | 2 | hives, facial edema,cough | Not recorded in chart | outdoor running | Yes (episode 1:Spring; episode 2: Autumn) | (-) | d1-1.6KUA/L,d2-1.9KUA/L, w6-＞100， |
| 8 | F | 13Y | 3 | skin itching，hives, throat swelling, wheezing; | episode 1 (apple); episode 2 (banana); episode 3 (banana) | outdoor running | episode 1: Autumn; | AR,AS, U; | T-IgE 506KU/L, m6-10.8KUA/L,w6-76,w1-1.37,t3-0.52;f14-0.59,f1-0.42,f2-0.62,f4-0.62,f13-8.17 |
| 9 | F | 12Y | 1 | angioedema，amaurosis，faintness; | Not recorded in chart | outdoor running | Yes（Spring） | AR | SPT: Sa++++，Fr++++，Ai++++，Fi++++，Be++++，Ar++，Hu++++，Am++，Ch++++ |
| 10 | M | 4Y | 1 | angioedema，cough，wheezing，nausea | Not recorded in chart | outdoor running | Yes（Spring） | AR,AS,FA | SPT: Fr ++++，Fi+++，Be++，Ar++++, Hu++++，Am++，Ch +++ |
| 11 | F | 9Y | 1 | angioedema，cough，wheezing ，sneezing； | Not recorded in chart | outdoor quick walking | Yes （autumn） | AR,FA | SPT:A.alternata ++，cat dander+++，Sa+++，Fr++，Ai++++，Fi++++，Ar++++，Hu++++，Am ++++，Ch++++ |
| 12 | F | 6Y | 1 | skin itching, wheezing, facial edema | dinner mix food( rice, parrot, potato, strawberry) | outdoor quick walking | Yes (Spring) | （-) | D.pteronyssinus +++，D.farinae ++++，A.alternata—++，Penicillium chrysogenum  ++，dog dander++， |
| 13 | F | 10Y | 1 | hives,, amaurosis,LOC | wheat | outdoor playing basketball | Yes(Spring) | U, AR; | Mixed molds-4-49.6, e1-4-23.8,w6-3-14.3,t3-1.90 |
| 14 | M | 11Y | 1 | angioedema ，cough，SOB | cheery | outdoor running | NO | AR, FA; | T-IgE 40.2，w6-4.20， |
| 15 | F | 16Y | 1 | Throat closing | Not recorded in chart | outdoor ingruningning | Yes （autumn） | AR,AS; | Mix weed pollens-grade 2; |
| 16 | F | 6Y | 1 | wheezing, periorbital edema | Not recorded in chart | outdoor playing golf | Yes （autumn） | AR,AS; | Mix molds-3-12.6，mix weed pollens-3-3.6，mix tree pollens- 2-1.9 |

Abbreviation：SOB: short of breath; LOC: loss of consciousness; U，Urticaria; AR, allergic rhinitis; AS, asthma; FA, food allergy; CMA, cow’s milk allergy; SPT skin prick test; T-IgE, total IgE; d1, D.pteronyssinus; d2, D.farinae; m3, A.fumigatus; m6, A.alternata; w1(common ragweed);t3(common silver birch),e1(cat dander),e5(dog dander),w6(mugwort), f13(peanut), f1(egg white), f2(milk), f4(wheat), f14(soya bean), f23(crab), f24(shrimp); mixed molds (Penicillium chrysogenum, Cladosporium herbarum,Aspergillus fumigatus, Aspergillus niger, and Alternaria alternata), mixed weed pollens (careless weed,goosefoot, Japanese hop, and dandelion), mugwort/ragweed, and mixed tree pollens (mountain juniper, elm, maple leaf sycamore,white ash, willow, birch, oak, cottonwood, alder, and hazel).  Artemisia (Ar); Betula (Be)；Chenopodium (Ch); Humulus scandens (Hu); Sabina chinensis(Sa); Ailanthus altissima （Ai）;Firmiana simplex（Fi)，Fraxinus pennsylvanica （Fr)，Ambrosia artemisiifolia （Am）
